# Supplementary material for: Woody Species Diversity, Vegetation Structure, and Regeneration Status of the Moist Afromontane Forest of Agama in Southwestern Ethiopia
Source: Hindawi journal article supplement (doi:10.1155/2020/1629624), 2020-06-30
Supplement: f1 [file 1629624.f1.pdf]

| Species name                                 | occurrence | frequency | Relative frequency | No of individuals | Density | Relative Density | BA in sqm/h | R DO (RBA) |
|----------------------------------------------|------------|-----------|--------------------|-------------------|---------|------------------|-------------|------------|
| <i>Alangium chinense (Lour) Harms</i>        | 1          | 1.67      | 0.09               | 6                 | 1.60    | 0.11             | 0.03        | 0.04       |
| <i>Albizia gummifera</i>                     | 14         | 23.33     | 1.21               | 14                | 3.73    | 0.26             | 0.13        | 0.16       |
| <i>Albizia Schimperiana</i>                  | 2          | 3.33      | 0.17               | 2                 | 0.53    | 0.04             | 0.02        | 0.03       |
| <i>Allophylus abyssinica</i>                 | 19         | 31.67     | 1.65               | 34                | 9.07    | 0.63             | 0.19        | 0.23       |
| <i>Apodytes dimidiata E. Mey. ex Arn</i>     | 15         | 25.00     | 1.30               | 25                | 6.67    | 0.46             | 0.84        | 1.04       |
| <i>Bersama abyssinica Fresen.</i>            | 45         | 75.00     | 3.90               | 146               | 38.93   | 2.68             | 0.84        | 1.04       |
| <i>Buddleja polystachya</i>                  | 1          | 1.67      | 0.09               | 16                | 4.27    | 0.29             | 0.17        | 0.22       |
| <i>Canthium oligocarpum Hiern</i>            | 36         | 60.00     | 3.12               | 92                | 24.53   | 1.69             | 0.66        | 0.82       |
| <i>Cassipourea malosana (Baker)</i>          | 3          | 5.00      | 0.26               | 6                 | 1.60    | 0.11             | 0.01        | 0.01       |
| <i>Celtis Africana</i>                       | 7          | 11.67     | 0.61               | 9                 | 2.40    | 0.17             | 0.25        | 0.31       |
| <i>Clausena anisata</i>                      | 8          | 13.33     | 0.69               | 10                | 2.67    | 0.18             | 0.01        | 0.02       |
| <i>Clematis semensis</i>                     | 2          | 3.33      | 0.17               | 2                 | 0.53    | 0.04             | 0.002       | 0.002      |
| <i>Coffea arbica</i>                         | 39         | 65.00     | 3.38               | 221               | 58.93   | 4.06             | 0.20        | 0.24       |
| <i>Cordia Africana</i>                       | 5          | 8.33      | 0.43               | 5                 | 1.33    | 0.09             | 0.09        | 0.11       |
| <i>Croton macostachys</i>                    | 13         | 21.67     | 1.13               | 44                | 11.73   | 0.81             | 0.77        | 0.95       |
| <i>Cyathea manniana Hook.</i>                | 6          | 10.00     | 0.52               | 117               | 31.20   | 2.15             | 0.43        | 0.54       |
| <i>Dalbergia alata</i>                       | 3          | 5.00      | 0.26               | 5                 | 1.33    | 0.09             | 0.003       | 0.004      |
| <i>Dombeya torrid</i>                        | 1          | 1.67      | 0.09               | 2                 | 0.53    | 0.04             | 0.00        | 0.00       |
| <i>Dracaena steudneri Scw.ex Engl.</i>       | 19         | 31.67     | 1.65               | 35                | 9.33    | 0.64             | 0.42        | 0.52       |
| <i>Dracena afromontana</i>                   | 26         | 43.33     | 2.25               | 184               | 49.07   | 3.38             | 0.55        | 0.68       |
| <i>Ehretia cymosa</i>                        | 9          | 15.00     | 0.78               | 18                | 4.80    | 0.33             | 0.08        | 0.10       |
| <i>Ekebergia capensis</i>                    | 1          | 1.67      | 0.09               | 1                 | 0.27    | 0.02             | 0.11        | 0.14       |
| <i>Elaeodendron buchananii {Loes.} Loes,</i> | 50         | 83.33     | 4.33               | 663               | 176.80  | 12.19            | 5.02        | 6.21       |
| <i>Erythrococca trichogyne</i>               | 16         | 26.67     | 1.39               | 32                | 8.53    | 0.59             | 0.08        | 0.10       |
| <i>Euphorbia ampiliphyla</i>                 | 2          | 3.33      | 0.17               | 2                 | 0.53    | 0.04             | 0.26        | 0.32       |
| <i>Fagraopsis angolensis</i>                 | 16         | 26.67     | 1.39               | 28                | 7.47    | 0.51             | 0.35        | 0.43       |
| <i>Ficus sur</i>                             | 21         | 35.00     | 1.82               | 53                | 14.13   | 0.97             | 1.09        | 1.35       |
| <i>Flacourtia indica</i>                     | 7          | 11.67     | 0.61               | 13                | 3.47    | 0.24             | 0.04        | 0.05       |
| <i>Gallinaria saxifraga</i>                  | 42         | 70.00     | 3.64               | 99                | 26.40   | 1.82             | 0.25        | 0.31       |

| Species name                                       | occurrence | frequency | Relative frequency | No of individuals | Density | Relative Density | BA in sqm/h | R DO (RBA) |
|----------------------------------------------------|------------|-----------|--------------------|-------------------|---------|------------------|-------------|------------|
| <i>Hippocartes pallens</i>                         | 26         | 43.33     | 2.25               | 57                | 15.20   | 1.05             | 0.08        | 0.10       |
| <i>Illex mitis</i>                                 | 21         | 35.00     | 1.82               | 110               | 29.33   | 2.02             | 1.59        | 1.97       |
| <i>Landolphia buchanani</i>                        | 35         | 58.33     | 3.03               | 116               | 30.93   | 2.13             | 0.22        | 0.27       |
| <i>Lepidagathis glandulosa</i> Hochst. ex Nees     | 10         | 16.67     | 0.87               | 15                | 4.00    | 0.28             | 0.02        | 0.02       |
| <i>Lepidotrichilia volkensii</i> (Gurke) Leory     | 25         | 41.67     | 2.16               | 104               | 27.73   | 1.91             | 0.35        | 0.43       |
| <i>Macaranga capensis</i> (Baill.) Sim             | 18         | 30.00     | 1.56               | 82                | 21.87   | 1.51             | 0.74        | 0.91       |
| <i>Masea lanceolata</i>                            | 5          | 8.33      | 0.43               | 57                | 15.20   | 1.05             | 0.36        | 0.45       |
| <i>Maytenus gracilipes</i> (Welw.ex Oliv.) Exell   | 18         | 30.00     | 1.56               | 64                | 17.07   | 1.18             | 0.07        | 0.09       |
| <i>Millettia ferruginea</i> (Hochst.) Baker        | 41         | 68.33     | 3.55               | 290               | 77.33   | 5.33             | 1.79        | 2.21       |
| <i>Ocotea kenyensis</i> (Chiov.) Robyns & Wilcz    | 21         | 35.00     | 1.82               | 47                | 12.53   | 0.86             | 1.02        | 1.26       |
| <i>olea capensis</i>                               | 59         | 98.33     | 5.11               | 808               | 215.47  | 14.85            | 1.63        | 2.01       |
| <i>Olea welwitschii</i> (Knobl.) Gilg & Schellenb. | 52         | 86.67     | 4.50               | 178               | 47.47   | 3.27             | 26.87       | 33.25      |
| <i>Oxyanthus speciosus</i> DC.                     | 52         | 86.67     | 4.50               | 249               | 66.40   | 4.58             | 1.10        | 1.36       |
| <i>Pavetta abyssinica</i>                          | 1          | 1.67      | 0.09               | 2                 | 0.53    | 0.04             | 0.0005      | 0.001      |
| <i>Phonix reclinata</i>                            | 24         | 40.00     | 2.08               | 98                | 26.13   | 1.80             | 1.35        | 1.67       |
| <i>Pittosporum viridiflorum</i> Sims               | 17         | 28.33     | 1.47               | 20                | 5.33    | 0.37             | 0.06        | 0.08       |
| <i>Polyscias fulva</i> (Hiern) Harms               | 16         | 26.67     | 1.39               | 22                | 5.87    | 0.40             | 1.82        | 2.25       |
| <i>Pouteria adolfi-friederici</i> (Engl.) Baehni   | 11         | 18.33     | 0.95               | 22                | 5.87    | 0.40             | 0.36        | 0.44       |
| <i>Premna schimperi</i>                            | 1          | 1.67      | 0.09               | 2                 | 0.53    | 0.04             | 0.01        | 0.01       |
| <i>Prunus Africana</i>                             | 8          | 13.33     | 0.69               | 12                | 3.20    | 0.22             | 0.66        | 0.81       |
| <i>Psychotria orophila</i> Petit                   | 8          | 13.33     | 0.69               | 10                | 2.67    | 0.18             | 0.004       | 0.004      |
| <i>Rhamnus prinoides</i>                           | 1          | 1.67      | 0.09               | 1                 | 0.27    | 0.02             | 0.003       | 0.004      |
| <i>Rothmannia urcelliformis</i> (Hiern) Robyns     | 34         | 56.67     | 2.94               | 68                | 18.13   | 1.25             | 0.14        | 0.17       |
| <i>Rytignia neglecta</i> (Hirn) Robyns             | 24         | 40.00     | 2.08               | 88                | 23.47   | 1.62             | 0.20        | 0.24       |
| <i>Sapium ellipticum</i> (Krauss) Pax              | 26         | 43.33     | 2.25               | 45                | 12.00   | 0.83             | 4.49        | 5.55       |
| <i>Schefflera abyssinica</i>                       | 28         | 46.67     | 2.42               | 51                | 13.60   | 0.94             | 11.66       | 14.43      |
| <i>Syzygium guineense</i> (Willd.) DC.             | 53         | 88.33     | 4.59               | 234               | 62.40   | 4.30             | 9.72        | 12.03      |
| <i>Teclea nobilis</i> Del.                         | 24         | 40.00     | 2.08               | 96                | 25.60   | 1.76             | 0.18        | 0.22       |
| <i>Tiliacora troupinii</i> Cuf.                    | 2          | 3.33      | 0.17               | 3                 | 0.80    | 0.06             | 0.02        | 0.02       |
| <i>Trema orientalis</i> (uffo)                     | 2          | 3.33      | 0.17               | 2                 | 0.53    | 0.04             | 0.01        | 0.01       |
| <i>Vepris dainellii</i> (Pich.-Serm.) Kokwaro      | 57         | 95.00     | 4.94               | 575               | 153.33  | 10.57            | 1.30        | 1.61       |

| Species name                 | occurrence | frequency | Relative frequency | No of individuals | Density | Relative Density | BA in sqm/h | R DO (RBA) |
|------------------------------|------------|-----------|--------------------|-------------------|---------|------------------|-------------|------------|
| <i>Vernonia amgdalina</i>    | 1          | 1.67      | 0.09               | 1                 | 0.27    | 0.02             | 0.01        | 0.01       |
| <i>Vernonia auriculifera</i> | 1          | 1.67      | 0.09               | 3                 | 0.80    | 0.06             | 0.01        | 0.01       |
|                              |            | 1918.33   |                    | <b>5416</b>       | 1444.27 |                  | 80.70       | 99.88      |

97

Additional file 2 data used to calculate Importance Value Index (IVI)

| Species name                                   | Relative Density | Relative frequency | Relative dominance | IVI   | % IVI |
|------------------------------------------------|------------------|--------------------|--------------------|-------|-------|
| <i>Alangium chinense (Lour) Harms</i>          | 0.11             | 0.09               | 0.04               | 0.24  | 0.08  |
| <i>Albizia gummifera</i>                       | 0.28             | 1.21               | 0.16               | 1.64  | 0.55  |
| <i>Albizia Schimperiana</i>                    | 0.04             | 0.17               | 0.03               | 0.24  | 0.08  |
| <i>Allophylus abyssinica</i>                   | 0.74             | 1.65               | 0.23               | 2.61  | 0.87  |
| <i>Apodytes dimidiata E. Mey. ex Arn</i>       | 0.46             | 1.30               | 1.04               | 2.79  | 0.93  |
| <i>Bersama abyssinica Fresen.</i>              | 2.70             | 3.90               | 1.04               | 7.63  | 2.55  |
| <i>Buddleja polystachya</i>                    | 0.29             | 0.09               | 0.22               | 0.60  | 0.20  |
| <i>Canthium oligocarpum Hiern</i>              | 1.69             | 3.12               | 0.82               | 5.62  | 1.88  |
| <i>Cassipourea malosana (Baker)</i>            | 0.11             | 0.26               | 0.01               | 0.38  | 0.13  |
| <i>Celtis africana</i>                         | 0.18             | 0.61               | 0.31               | 1.10  | 0.37  |
| <i>Clausena anisata</i>                        | 0.18             | 0.69               | 0.02               | 0.89  | 0.30  |
| <i>Clematis semensis</i>                       | 0.04             | 0.17               | 0.00               | 0.21  | 0.07  |
| <i>Coffea arbica</i>                           | 4.08             | 3.38               | 0.24               | 7.70  | 2.57  |
| <i>Cordia africana</i>                         | 0.09             | 0.43               | 0.11               | 0.63  | 0.21  |
| <i>Croton macostachys</i>                      | 0.81             | 1.13               | 0.95               | 2.88  | 0.96  |
| <i>Cyathea manniana Hook.</i>                  | 2.15             | 0.52               | 0.54               | 3.21  | 1.07  |
| <i>Dalbergia alata</i>                         | 0.09             | 0.26               | 0.004              | 0.36  | 0.12  |
| <i>Dombeya torrida</i>                         | 0.04             | 0.09               | 0.14               | 0.27  | 0.09  |
| <i>Dracaena steudneri Sw.ex Engl.</i>          | 0.66             | 1.65               | 0.52               | 2.83  | 0.94  |
| <i>Dracena afromontana</i>                     | 3.38             | 2.25               | 0.68               | 6.31  | 2.11  |
| <i>Ehretia cymosa</i>                          | 0.33             | 0.78               | 0.10               | 1.21  | 0.40  |
| <i>Ekebergia capensis</i>                      | 0.02             | 0.09               | 0.14               | 0.24  | 0.08  |
| <i>Elaeodendron buchananii {Loes.} Loes,</i>   | 12.19            | 4.33               | 6.21               | 22.73 | 7.59  |
| <i>Erythrococca trichogyne</i>                 | 0.59             | 1.39               | 0.10               | 2.08  | 0.69  |
| <i>Euphorbia ampiliphyla</i>                   | 0.04             | 0.17               | 0.32               | 0.53  | 0.18  |
| <i>Fragaropsis angolensis</i>                  | 0.51             | 1.39               | 0.43               | 2.33  | 0.78  |
| <i>Ficus sur</i>                               | 0.97             | 1.82               | 1.35               | 4.15  | 1.38  |
| <i>Flacourtia indica</i>                       | 0.24             | 0.61               | 0.05               | 0.90  | 0.30  |
| <i>Gallinaria saxifraga</i>                    | 1.82             | 3.64               | 0.31               | 5.76  | 1.92  |
| <i>Hippocartes pallens</i>                     | 1.05             | 2.25               | 0.10               | 3.40  | 1.13  |
| <i>Illex mitis</i>                             | 2.02             | 1.82               | 1.97               | 5.81  | 1.94  |
| <i>Landolphia buchanani</i>                    | 2.13             | 3.03               | 0.27               | 5.44  | 1.82  |
| <i>Lepidagathis glandulosa Hochst. ex Nees</i> | 0.28             | 0.87               | 0.02               | 1.16  | 0.39  |
| <i>Lepidotrichilia volkensii (Gurke) Leory</i> | 1.91             | 2.16               | 0.43               | 4.51  | 1.51  |
| <i>Macaranga capensis (Baill.) Sim</i>         | 1.51             | 1.56               | 0.91               | 3.98  | 1.33  |
| <i>Masea lanceolata</i>                        | 1.05             | 0.43               | 0.45               | 1.93  | 0.64  |

| Species name                                       | Relative Density | Relative frequency | Relative dominance | IVI   | % IVI |
|----------------------------------------------------|------------------|--------------------|--------------------|-------|-------|
| <i>Maytenus gracilipes</i> (Welw.ex Oliv.) Exell   | 1.18             | 1.56               | 0.09               | 2.82  | 0.94  |
| <i>Millettia ferruginea</i> (Hochst.) Baker        | 5.33             | 3.55               | 2.21               | 11.09 | 3.70  |
| <i>Ocotea kenyensis</i> (Chiov.) Robyns & Wilcz    | 0.86             | 1.82               | 1.26               | 3.94  | 1.32  |
| <i>Olea capensis</i>                               | 14.85            | 5.11               | 2.01               | 21.97 | 7.34  |
| <i>Olea welwitschii</i> (Knobl.) Gilg & Schellenb. | 3.27             | 4.50               | 33.25              | 41.03 | 13.70 |
| <i>Oxyanthus speciosus</i> DC.                     | 4.58             | 4.50               | 1.36               | 10.44 | 3.49  |
| <i>Pavetta abyssinica</i>                          | 0.04             | 0.09               | 0.001              | 0.12  | 0.04  |
| <i>Phonix reclinata</i>                            | 1.80             | 2.08               | 1.67               | 5.55  | 1.85  |
| <i>Pittosporum viridiflorum</i> Sims               | 0.37             | 1.47               | 0.08               | 1.92  | 0.64  |
| <i>Polyscias fulva</i> (Hiern) Harms               | 0.40             | 1.39               | 2.25               | 4.04  | 1.35  |
| <i>Pouteria adolfi-friederici</i> (Engl.) Baehni   | 0.39             | 0.95               | 0.44               | 1.78  | 0.59  |
| <i>Premna schimperii</i>                           | 0.04             | 0.09               | 0.01               | 0.13  | 0.04  |
| <i>Prunus africana</i>                             | 0.22             | 0.69               | 0.81               | 1.72  | 0.58  |
| <i>Psychotria orophila</i> Petit                   | 0.18             | 0.69               | 0.004              | 0.88  | 0.29  |
| <i>Rhamnus prinoides</i>                           | 0.02             | 0.09               | 0.004              | 0.11  | 0.04  |
| <i>Rothmannia urcelliformis</i> (Hiern) Robyns     | 1.25             | 2.94               | 0.17               | 4.37  | 1.46  |
| <i>Rytignia neglecta</i> (Hirn) Robyns             | 1.62             | 2.08               | 0.24               | 3.94  | 1.32  |
| <i>Sapium ellipticum</i> (Krauss) Pax              | 0.83             | 2.25               | 5.55               | 8.63  | 2.88  |
| <i>Schefflera abyssinica</i>                       | 0.94             | 2.42               | 14.43              | 17.79 | 5.94  |
| <i>Syzygium guineense</i> (Willd.) DC.             | 4.30             | 4.59               | 12.03              | 20.92 | 6.99  |
| <i>Teclea nobilis</i> Del.                         | 1.76             | 2.08               | 0.22               | 4.06  | 1.36  |
| <i>Tiliacora troupinii</i> Cuf.                    | 0.06             | 0.17               | 0.02               | 0.25  | 0.08  |
| <i>Trema orientalis</i> (uffo)                     | 0.04             | 0.17               | 0.01               | 0.22  | 0.07  |
| <i>Vepris dainellii</i> (Pich.-Serm.) Kokwaro      | 10.57            | 4.94               | 1.61               | 17.11 | 5.71  |
| <i>Vernonia amgdalina</i>                          | 0.02             | 0.09               | 0.01               | 0.12  | 0.04  |
| <i>Vernonia auriculifera</i>                       | 0.06             | 0.09               | 0.01               | 0.15  | 0.05  |

Additional file 3 data used to determine regeneration status and priority class for conservation

| Species name                                          | Seedling<br>/ha | sapling/<br>ha | Tree/<br>shrub/<br>ha | Total | Regeneration<br>Status |
|-------------------------------------------------------|-----------------|----------------|-----------------------|-------|------------------------|
| <i>Alangium chinense</i> (Lour) Harms                 | 0               | 0              | 1                     | 1     | good                   |
| <i>Albizia gummifera</i>                              | 140             | 55             | 4                     | 199   | good                   |
| <i>Allophylus abyssinica</i>                          | 71              | 28             | 10                    | 108   | good                   |
| <i>Apodytes dimidiata</i> E. Mey. ex Arn              | 40              | 24             | 4                     | 68    | good                   |
| <i>Bersama abyssinica</i> Fresen.                     | 120             | 80             | 40                    | 240   | good                   |
| <i>Buddleja polystachya</i>                           | 8               | 0              | 4                     | 12    | Fair                   |
| <i>Canthium oligocarpum</i> Hiern                     | 120             | 52             | 26                    | 198   | good                   |
| <i>Cassipourea malosana</i> (Baker)                   | 7               | 4              | 2                     | 13    | good                   |
| <i>Celtis africana</i>                                | 19              | 7              | 3                     | 29    | good                   |
| <i>Clausena anisate</i>                               | 95              | 47             | 12                    | 154   | good                   |
| <i>Coffea arabica</i>                                 | 220             | 156            | 57                    | 433   | good                   |
| <i>Cordia Africana</i>                                | 0               | 0              | 2                     | 2     | No regeneration        |
| <i>Croton macostachys</i>                             | 69              | 30             | 9                     | 107   | good                   |
| <i>Cyathea manniana</i> Hook.                         | 0               | 0              | 30                    | 30    | Fair                   |
| <i>Dombeya torrida</i>                                | 3               | 1              | 0.5                   | 4     | good                   |
| <i>Dracaena steudneri</i> Scw.ex Engl.                | 72              | 26             | 14                    | 112   | good                   |
| <i>Dracena afromontana</i>                            | 30              | 45             | 48                    | 123   | good                   |
| <i>Ehretia cymosa</i>                                 | 28              | 10             | 5                     | 43    | good                   |
| <i>Ekebergia capensis</i>                             | 0               | 0              | 0.3                   | 0     | No regeneration        |
| <i>Elaeodendron buchananii</i>                        | 250             | 162            | 178                   | 589   | Fair                   |
| <i>Erythrococca trichogyne</i>                        | 3               | 2              | 9                     | 14    | good                   |
| <i>Euphorbia ampiliphyla</i>                          | 2               | 0              | 2                     | 4     | No regeneration        |
| <i>Fagraopsis angolensis</i>                          | 2               | 0              | 9                     | 11    | good                   |
| <i>Ficus sur</i>                                      | 3               | 6              | 25                    | 34    | fair                   |
| <i>Flacourtia indica</i>                              | 0               | 10             | 4                     | 14    | poor                   |
| <i>Gallinaria saxifraga</i>                           | 159             | 70             | 24                    | 253   | good                   |
| <i>Illex mitis</i>                                    | 107             | 43             | 28                    | 178   | good                   |
| <i>Lepidotrichilia volkensii</i> (Gurke)<br>Leory     | 115             | 52             | 24                    | 191   | good                   |
| <i>Macaranga capensis</i> (Baill.) Sim                | 80              | 36             | 20                    | 136   | good                   |
| <i>Masea lanceolata</i>                               | 40              | 32             | 14                    | 86    | good                   |
| <i>Maytenus gracilipes</i> (Welw.ex<br>Oliv.) Exell   | 150             | 144            | 21                    | 315   | good                   |
| <i>Millettia ferruginea</i> (Hochst.) Baker           | 170             | 90             | 81                    | 341   | good                   |
| <i>Ocotea kenyensis</i> (Chiov.) Robyns<br>& Wilcz    | 5               | 6              | 13                    | 24    | good                   |
| <i>Olea capensis</i>                                  | 250             | 206            | 204                   | 660   | good                   |
| <i>Olea welwitschii</i> (Knobl.) Gilg &<br>Schellenb. | 12              | 15             | 49                    | 76    | good                   |
| <i>Oxyanthus speciosus</i> DC.                        | 159             | 65             | 109                   | 333   | good                   |

|                                                  |     |     |     |     |                 |
|--------------------------------------------------|-----|-----|-----|-----|-----------------|
| <i>Phonix reclinata</i>                          | 240 | 60  | 26  | 326 | good            |
| <i>Pittosporum viridiflorum</i> Sims             | 6   | 4   | 2   | 12  | good            |
| <i>Polyscias fulva</i> (Hiern) Harms             | 2   | 8   | 6   | 16  | good            |
| <i>Pouteria adolfi-friederici</i> (Engl.) Baehni | 15  | 10  | 9   | 34  | good            |
| <i>Premna schimperi</i>                          | 2   | 0   | 1   | 2   | good            |
| <i>Prunus Africana</i>                           | 18  | 7   | 3   | 29  | good            |
| <i>Psychotria orophila</i> Petit                 | 60  | 40  | 28  | 128 | good            |
| <i>Rhamnus prinoides</i>                         | 3   | 0   | 1   | 3   | good            |
| <i>Rothmannia urcelliformis</i> (Hiern) Robyns   | 32  | 22  | 21  | 75  | good            |
| <i>Rytignia neglecta</i> (Hirn) Robyns           | 30  | 25  | 23  | 78  | good            |
| <i>Sapium ellipticum</i> (Krauss) Pax            | 10  | 12  | 14  | 36  | good            |
| <i>Schefflera abyssinica</i>                     | 0   | 0   | 20  | 20  | No regeneration |
| <i>Syzygium guineense</i> (Willd.) DC.           | 120 | 60  | 65  | 245 | good            |
| <i>Teclea nobilis</i> Del.                       | 40  | 30  | 25  | 95  | good            |
| <i>Trema orientalis</i> (uffo)                   | 2   | 0   | 0.3 | 2   | good            |
| <i>Vepris dainellii</i> (Pich.-Serm.) Kokwaro    | 235 | 101 | 155 | 491 | good            |
| <i>Vernonia amgdalina</i>                        | 1.1 | 1   | 0.3 | 2   | good            |
| <i>Vernonia auriculifera</i>                     | 14  | 4   | 1   | 19  | good            |
